# Supplementary material for: On the Orientation Error of IMU: Investigating Static and Dynamic Accuracy Targeting Human Motion
Source: PubMed Central journal article supplement (PMC5017605; doi:10.1371/journal.pone.0161940), 2016-09-09
Supplement: pone.0161940.s001.pdf [file pone.0161940.s001.pdf]

S1 Table: **Dynamic accuracy Table.** All the reported values are in  $^{\circ}$ . Accuracy is expressed as the **median value** : 95% range. AH. stands for Attitude and Heading movements.

| <b>ABSOLUTE ACCURACY</b> |                |         |                |         |                |         |                |         |                |         |                |         |                |         |
|--------------------------|----------------|---------|----------------|---------|----------------|---------|----------------|---------|----------------|---------|----------------|---------|----------------|---------|
| <b>Attitude</b>          | <b>0.18 Hz</b> |         | <b>0.32 Hz</b> |         | <b>0.56 Hz</b> |         | <b>1.00 Hz</b> |         | <b>1.78 Hz</b> |         | <b>3.16 Hz</b> |         | <b>5.62 Hz</b> |         |
|                          | KF             | CF      | KF             | CF      | KF             | CF      | KF             | CF      | KF             | CF      | KF             | CF      | KF             | CF      |
| $\pm 3^{\circ}$          | 0.4:1.0        | 0.3:0.9 | 0.5:1.8        | 0.3:1.0 | 0.5:1.5        | 0.3:1.0 | 0.4:1.5        | 0.5:1.5 | 0.7:2.0        | 0.9:2.0 | 0.7:2.0        | 1.0:3.9 | 0.8:2.5        | 2.3:5.7 |
| $\pm 6^{\circ}$          | 0.5:1.6        | 0.4:1.3 | 0.4:1.0        | 0.4:1.4 | 0.6:1.9        | 0.6:2.3 | 0.7:1.5        | 1.3:3.7 | 0.7:1.8        | 1.3:3.1 | 0.7:1.8        | 1.8:3.5 | 1.0:3.5        | 2.0:3.2 |
| $\pm 5^{\circ}$          | 0.5:2.0        | 0.3:0.7 | 0.5:1.7        | 0.4:1.2 | 0.5:1.9        | 0.5:2.0 | 0.5:2.0        | 0.9:2.0 | 0.8:2.3        | 1.1:2.4 | 0.8:2.3        | 1.7:4.3 | -              | -       |
| $\pm 10^{\circ}$         | 0.5:1.7        | 0.5:1.6 | 0.5:1.8        | 0.7:2.4 | 0.5:2.1        | 1.0:2.8 | 0.7:1.9        | 1.6:4.0 | 0.9:2.6        | 2.1:4.2 | 0.8:2.6        | 3.0:6.4 | -              | -       |
| $\pm 9^{\circ}$          | 0.6:1.7        | 0.4:1.4 | 0.5:1.9        | 0.5:2.2 | 0.6:2.0        | 0.7:1.7 | 0.7:2.3        | 1.6:4.3 | 0.9:2.4        | 1.8:3.8 | -              | -       | -              | -       |
| $\pm 18^{\circ}$         | 0.6:2.1        | 0.8:2.7 | 0.6:2.1        | 0.8:2.7 | 0.7:1.9        | 1.7:3.6 | 0.8:2.3        | 2.2:3.7 | 0.9:2.5        | 3.3:8.3 | -              | -       | -              | -       |
| <b>AH.</b>               | <b>0.18 Hz</b> |         | <b>0.32 Hz</b> |         | <b>0.56 Hz</b> |         | <b>1.00 Hz</b> |         | <b>1.78 Hz</b> |         | <b>3.16 Hz</b> |         | <b>5.62 Hz</b> |         |
|                          | KF             | CF      | KF             | CF      | KF             | CF      | KF             | CF      | KF             | CF      | KF             | CF      | KF             | CF      |
| $\pm 3^{\circ}$          | 0.6:2.3        | 0.4:1.2 | 0.5:3.0        | 0.5:1.6 | 0.5:2.6        | 0.5:1.6 | 0.6:2.0        | 0.9:2.1 | 0.8:2.7        | 1.2:2.2 | 0.9:3.0        | 1.4:4.2 | 0.9:2.8        | 2.4:4.9 |
| $\pm 6^{\circ}$          | 0.5:2.1        | 0.7:2.4 | 0.6:2.4        | 0.7:2.4 | 0.6:2.3        | 0.8:2.5 | 0.8:2.7        | 1.5:2.8 | 1.0:3.1        | 1.4:2.7 | 0.9:2.6        | 1.8:4.6 | 0.8:2.9        | 4.5:8.2 |
| $\pm 5^{\circ}$          | 0.6:3.0        | 0.5:2.1 | 0.8:3.4        | 0.6:2.0 | 0.6:2.3        | 0.9:2.1 | 0.7:2.2        | 1.5:3.0 | 0.9:2.9        | 1.6:3.2 | 0.9:2.8        | 1.7:5.1 | -              | -       |
| $\pm 10^{\circ}$         | 0.7:2.6        | 1.1:3.3 | 0.7:2.8        | 1.3:3.5 | 0.6:2.7        | 1.5:3.4 | 0.7:3.0        | 1.8:4.3 | 0.9:3.1        | 1.8:3.8 | 1.0:3.3        | 3.2:5.3 | -              | -       |
| $\pm 9^{\circ}$          | 0.9:4.4        | 0.8:3.1 | 0.8:2.9        | 1.2:3.1 | 0.6:2.7        | 1.5:3.9 | 0.9:3.0        | 1.8:4.0 | 0.9:3.0        | 2.1:4.0 | -              | -       | -              | -       |
| $\pm 18^{\circ}$         | 0.6:2.6        | 1.6:5.2 | 0.8:2.9        | 1.9:4.4 | 1.0:3.1        | 2.4:4.7 | 1.0:3.0        | 2.1:4.8 | 1.1:4.3        | 3.1:7.0 | -              | -       | -              | -       |
| <b>Heading</b>           | <b>0.18 Hz</b> |         | <b>0.32 Hz</b> |         | <b>0.56 Hz</b> |         | <b>1.00 Hz</b> |         | <b>1.78 Hz</b> |         | <b>3.16 Hz</b> |         | <b>5.62 Hz</b> |         |
|                          | KF             | CF      | KF             | CF      | KF             | CF      | KF             | CF      | KF             | CF      | KF             | CF      | KF             | CF      |
| $\pm 3^{\circ}$          | 0.9:2.7        | 0.6:2.7 | 0.6:2.8        | 0.6:2.4 | 0.6:2.2        | 0.7:2.2 | 0.6:1.9        | 1.0:2.8 | 0.7:2.3        | 1.2:2.5 | 0.7:2.1        | 1.4:2.7 | 0.8:1.9        | 1.3:4.4 |
| $\pm 6^{\circ}$          | 0.6:2.0        | 1.0:4.7 | 0.6:1.9        | 1.1:3.8 | 0.8:2.6        | 1.7:3.4 | 0.6:1.9        | 1.9:4.2 | 0.6:2.2        | 1.7:3.6 | 0.6:1.9        | 1.9:4.2 | 0.7:2.1        | 3.5:4.9 |
| $\pm 5^{\circ}$          | 0.6:1.9        | 0.9:2.5 | 0.6:2.6        | 0.6:2.6 | 0.5:2.2        | 1.0:3.7 | 0.6:2.3        | 1.5:2.9 | 0.5:1.9        | 1.5:2.6 | 0.7:2.2        | 1.6:4.0 | -              | -       |
| $\pm 10^{\circ}$         | 0.5:1.8        | 1.1:4.6 | 0.8:2.8        | 0.9:4.2 | 0.6:1.9        | 1.6:3.8 | 1.1:4.1        | 2.2:4.9 | 0.7:2.6        | 1.7:3.2 | 1.4:6.5        | 3.0:4.0 | -              | -       |
| $\pm 9^{\circ}$          | 0.9:3.3        | 1.1:4.1 | 0.7:3.0        | 1.0:4.0 | 1.5:4.2        | 1.6:4.3 | 1.1:3.3        | 2.0:3.3 | 0.8:2.8        | 1.6:3.4 | -              | -       | -              | -       |
| $\pm 18^{\circ}$         | 0.7:2.9        | 1.9:6.4 | 1.3:3.9        | 1.9:6.1 | 1.0:3.4        | 2.4:5.1 | 1.0:2.9        | 2.2:3.9 | 1.1:4.0        | 2.8:5.4 | -              | -       | -              | -       |
| <b>RELATIVE ACCURACY</b> |                |         |                |         |                |         |                |         |                |         |                |         |                |         |
| <b>Attitude</b>          | <b>0.18 Hz</b> |         | <b>0.32 Hz</b> |         | <b>0.56 Hz</b> |         | <b>1.00 Hz</b> |         | <b>1.78 Hz</b> |         | <b>3.16 Hz</b> |         | <b>5.62 Hz</b> |         |
|                          | KF             | CF      | KF             | CF      | KF             | CF      | KF             | CF      | KF             | CF      | KF             | CF      | KF             | CF      |
| $\pm 3^{\circ}$          | 0.4:1.2        | 0.4:1.8 | 0.5:1.8        | 0.3:1.2 | 0.5:1.5        | 0.4:1.4 | 0.6:1.6        | 0.8:2.0 | 0.7:1.8        | 1.1:2.7 | 0.7:2.0        | 1.2:3.1 | 0.9:2.4        | 2.7:5.6 |
| $\pm 6^{\circ}$          | 0.5:1.4        | 0.5:1.5 | 0.5:1.4        | 0.6:1.7 | 0.6:2.2        | 0.8:2.4 | 0.6:1.3        | 1.7:3.4 | 0.8:1.7        | 1.6:4.7 | 0.8:1.8        | 1.9:5.0 | 0.9:2.6        | 1.9:4.5 |
| $\pm 5^{\circ}$          | 0.7:2.2        | 0.4:1.0 | 0.6:1.9        | 0.6:2.0 | 0.6:1.7        | 0.7:2.3 | 0.7:2.0        | 1.3:2.7 | 0.8:2.1        | 1.3:3.4 | 0.8:1.9        | 2.1:3.8 | -              | -       |
| $\pm 10^{\circ}$         | 0.6:1.4        | 0.6:2.0 | 0.6:1.6        | 1.0:2.9 | 0.7:2.0        | 1.3:2.8 | 0.8:1.9        | 2.0:3.9 | 1.0:2.3        | 1.9:3.7 | 0.9:2.4        | 3.5:6.9 | -              | -       |
| $\pm 9^{\circ}$          | 0.7:2.0        | 0.6:2.2 | 0.6:1.7        | 0.8:2.5 | 0.6:1.7        | 1.0:1.9 | 0.8:2.2        | 2.1:4.9 | 0.8:2.2        | 2.1:3.8 | -              | -       | -              | -       |
| $\pm 18^{\circ}$         | 0.7:1.7        | 1.1:3.0 | 0.8:2.2        | 1.1:3.0 | 0.8:1.6        | 1.8:3.3 | 0.9:2.0        | 2.2:4.4 | 0.9:2.3        | 3.2:6.9 | -              | -       | -              | -       |
| <b>AH.</b>               | <b>0.18 Hz</b> |         | <b>0.32 Hz</b> |         | <b>0.56 Hz</b> |         | <b>1.00 Hz</b> |         | <b>1.78 Hz</b> |         | <b>3.16 Hz</b> |         | <b>5.62 Hz</b> |         |
|                          | KF             | CF      | KF             | CF      | KF             | CF      | KF             | CF      | KF             | CF      | KF             | CF      | KF             | CF      |
| $\pm 3^{\circ}$          | 0.6:2.2        | 0.5:1.8 | 0.8:4.2        | 0.6:2.2 | 0.9:3.8        | 0.6:2.1 | 0.8:2.9        | 1.1:2.6 | 1.0:3.4        | 1.3:2.8 | 1.1:3.4        | 1.6:5.0 | 1.1:3.3        | 1.8:3.6 |
| $\pm 6^{\circ}$          | 0.7:2.5        | 1.0:2.6 | 0.9:2.6        | 0.9:2.7 | 0.7:2.9        | 1.0:2.3 | 1.1:3.3        | 1.6:3.3 | 1.3:4.4        | 1.8:3.6 | 1.1:3.2        | 2.1:6.8 | 1.0:3.1        | 1.2:4.5 |
| $\pm 5^{\circ}$          | 0.8:3.2        | 0.8:3.9 | 0.9:3.7        | 0.9:2.9 | 0.8:2.8        | 1.1:2.4 | 0.9:3.4        | 1.7:3.8 | 1.3:3.4        | 1.9:3.9 | 1.0:3.2        | 2.0:4.5 | -              | -       |
| $\pm 10^{\circ}$         | 0.9:2.7        | 1.3:4.6 | 0.9:3.5        | 1.4:4.4 | 0.9:4.0        | 1.9:4.2 | 1.0:4.3        | 2.2:4.3 | 1.1:4.0        | 2.5:4.4 | 1.3:3.9        | 2.7:7.2 | -              | -       |
| $\pm 9^{\circ}$          | 1.0:4.4        | 1.0:3.7 | 1.0:3.5        | 1.3:3.5 | 0.8:3.1        | 2.1:4.4 | 1.1:3.5        | 1.9:4.2 | 1.1:4.1        | 2.2:4.6 | -              | -       | -              | -       |
| $\pm 18^{\circ}$         | 0.9:3.1        | 1.5:7.1 | 1.1:4.2        | 1.7:6.0 | 1.1:3.8        | 2.4:5.9 | 1.3:3.8        | 2.3:4.5 | 1.3:6.5        | 3.5:8.4 | -              | -       | -              | -       |
| <b>Heading</b>           | <b>0.18 Hz</b> |         | <b>0.32 Hz</b> |         | <b>0.56 Hz</b> |         | <b>1.00 Hz</b> |         | <b>1.78 Hz</b> |         | <b>3.16 Hz</b> |         | <b>5.62 Hz</b> |         |
|                          | KF             | CF      | KF             | CF      | KF             | CF      | KF             | CF      | KF             | CF      | KF             | CF      | KF             | CF      |
| $\pm 3^{\circ}$          | 0.7:2.2        | 0.8:3.9 | 1.0:5.7        | 0.6:3.6 | 0.9:3.5        | 0.8:3.4 | 0.9:3.1        | 1.2:4.2 | 1.1:4.4        | 1.1:3.2 | 1.0:3.2        | 1.3:3.6 | 1.0:3.0        | 1.8:5.2 |
| $\pm 6^{\circ}$          | 1.0:3.3        | 1.0:5.1 | 0.9:3.5        | 1.0:6.3 | 1.2:5.0        | 1.4:4.9 | 1.1:3.7        | 2.0:5.3 | 1.1:3.6        | 1.8:5.0 | 1.0:3.6        | 2.2:4.9 | 1.3:4.6        | 2.1:6.1 |
| $\pm 5^{\circ}$          | 0.7:2.5        | 0.6:2.7 | 0.9:4.6        | 0.7:2.7 | 1.2:4.2        | 1.1:3.9 | 1.3:5.4        | 1.3:2.8 | 1.2:4.5        | 1.3:3.3 | 1.1:4.5        | 2.0:4.1 | -              | -       |
| $\pm 10^{\circ}$         | 1.0:5.1        | 0.7:4.1 | 1.7:6.0        | 0.9:4.2 | 1.4:4.9        | 1.4:4.5 | 2.3:8.2        | 1.7:4.5 | 1.6:6.0        | 2.0:3.9 | 2.7:10.3       | 2.0:3.6 | -              | -       |
| $\pm 9^{\circ}$          | 1.4:6.4        | 0.9:4.4 | 1.3:5.1        | 0.9:3.6 | 2.1:7.3        | 1.9:5.1 | 1.8:6.3        | 1.5:3.9 | 1.5:5.5        | 1.5:4.2 | -              | -       | -              | -       |
| $\pm 18^{\circ}$         | 1.7:5.2        | 1.3:6.9 | 2.3:9.4        | 2.2:6.1 | 1.6:7.8        | 2.4:5.5 | 1.9:6.9        | 2.4:4.3 | 2.2:9.4        | 3.1:6.3 | -              | -       | -              | -       |
